# Supplementary material for: Evidence for negative effects of ZnO nanoparticles on leaf litter decomposition in freshwater ecosystems
Source: Royal Society of Chemistry journal article supplement (doi:10.1039/c7en00784a), 2017-01-01
Supplement: c7en00784a1.pdf [file c7en00784a1.pdf]

### Supplementary figures and table

**Fig. S1.** Graphical representation of sample preparation for quantization of total zinc and dissolved zinc ions in the microcosms.

**Fig. S2.** Scanning electron microscopy (SEM) images of interaction of (a) 30 nm ZnO, (b) 90 nm ZnO, (c) 200 nm ZnO NPs and the aquatic hyphomycetes present on the leaf litter.

**Fig. S3.** Characterization of ZnO NPs (a) UV-vis spectra and (b)  $\zeta$ -potential in the microcosms.

**Fig. S4.** Dynamic solubility of ZnO NPs in the microcosms of litter decomposition.

**Table S1** Particle diameter characterization of ZnO NPs in the microcosms. Standard deviations refer to three analytical replicates.

**Fig. S1.**

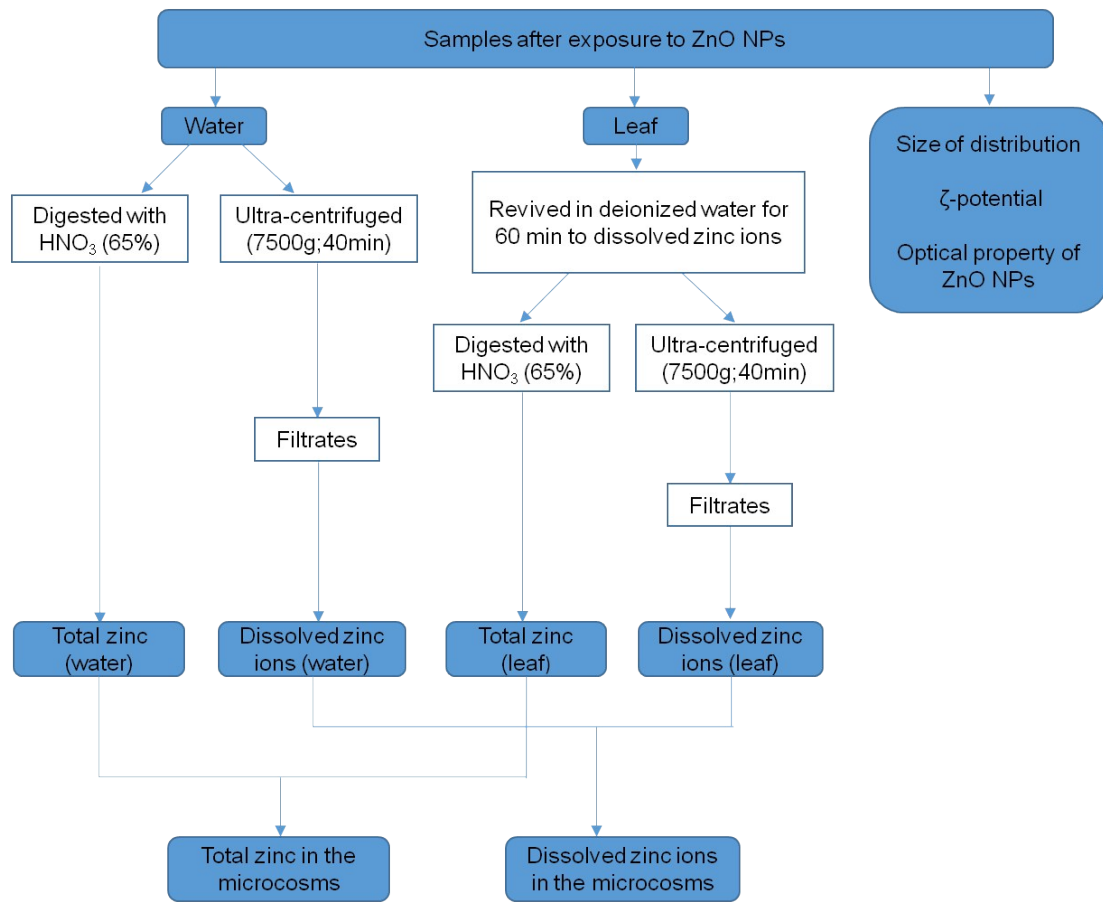

**Fig. S1.** Graphical representation of sample preparation for quantization of total zinc and dissolved zinc ions in the microcosms.

**Fig. S2.**

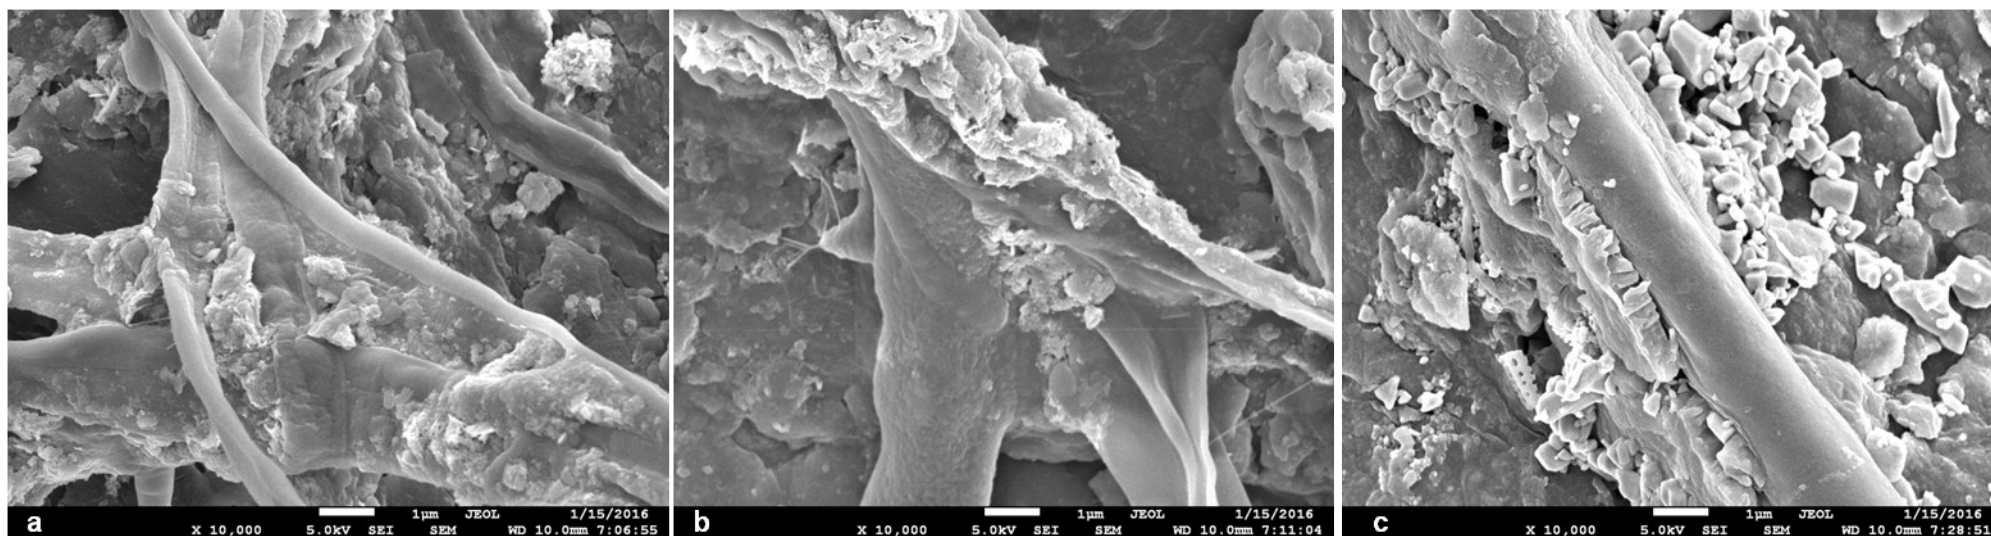

**Fig. S2.** Scanning electron microscopy (SEM) images of interaction of (a) 30 nm ZnO, (b) 90 nm ZnO, (c) 200 nm ZnO NPs and the aquatic hyphomycetes present on the leaf litter.

Fig. S3.

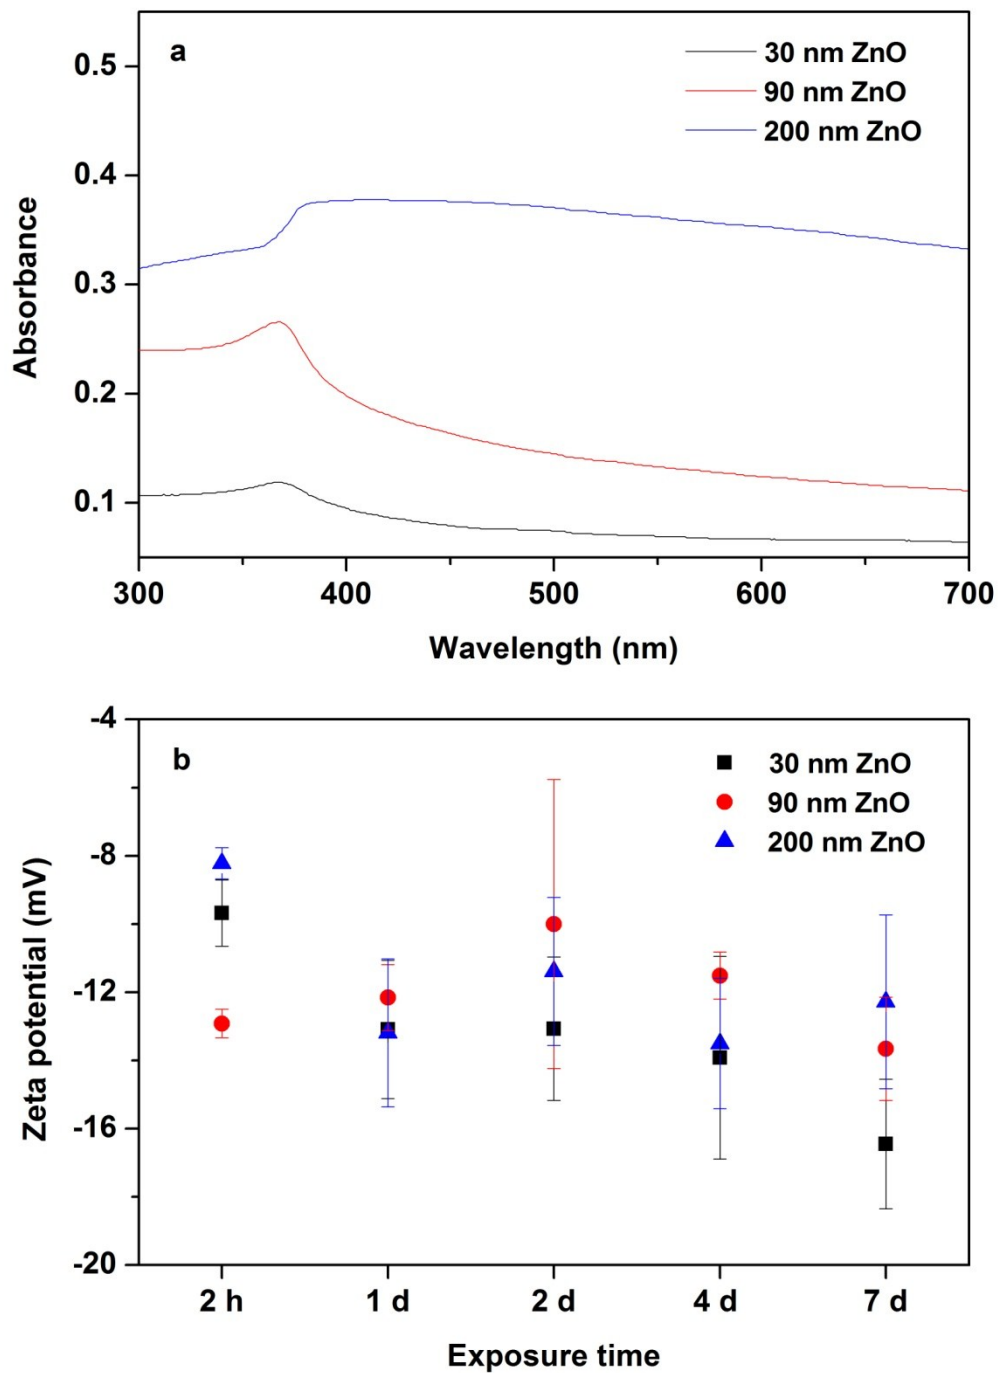

Fig. S3. Characterization of ZnO NPs (a) UV-vis spectra and (b)  $\zeta$ -potential in the microcosms.

Fig.S4.

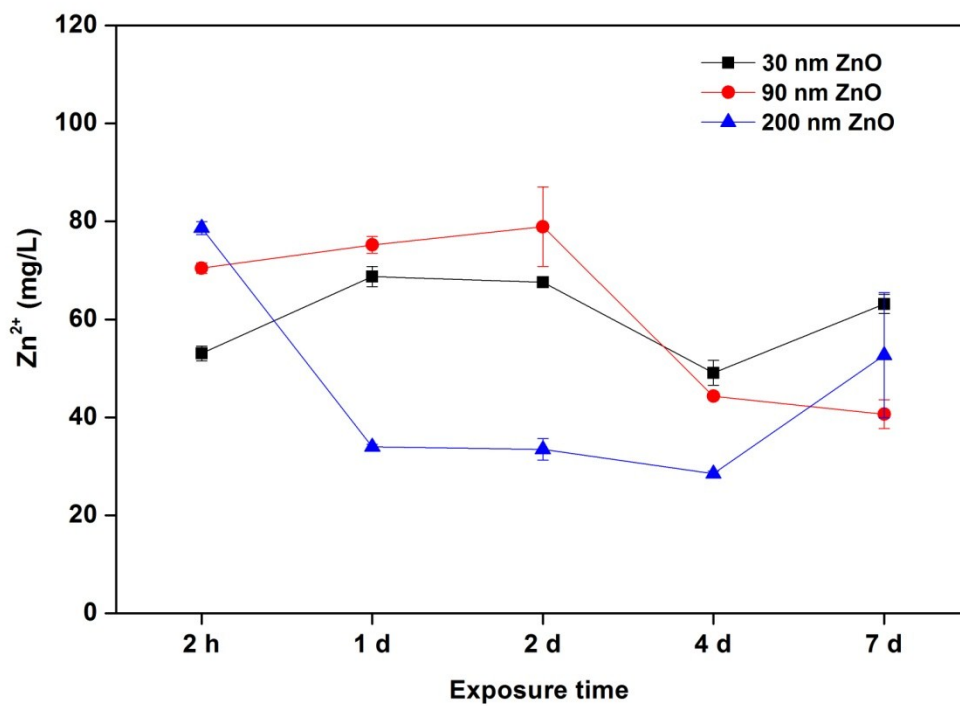

Fig. S4. Dynamic solubility of ZnO NPs in the microcosms of litter decomposition.

**Table S1**

Particle diameter characterization of ZnO NPs in the microcosms.

| Exposure time | Size distribution ( $\mu\text{m}$ ) |                   |                   |
|---------------|-------------------------------------|-------------------|-------------------|
|               | 30 nm ZnO                           | 90 nm ZnO         | 200 nm ZnO        |
| 2 hour        | 45.86 $\pm$ 7.97                    | 26.55 $\pm$ 18.78 | 42.82 $\pm$ 40.11 |
| 1 day         | 8.62 $\pm$ 6.93                     | 28.9 $\pm$ 19.17  | 39.12 $\pm$ 32.37 |
| 2 day         | 17.14 $\pm$ 16.48                   | 26.10 $\pm$ 26.04 | 80.80 $\pm$ 63.70 |
| 4 day         | 34.90 $\pm$ 27.52                   | 58.80 $\pm$ 52.41 | 20.40 $\pm$ 18.71 |
| 7 day         | 25.43 $\pm$ 18.48                   | 32.49 $\pm$ 16.78 | 31.56 $\pm$ 20.17 |

Note: Standard deviations refer to three analytical replicates.
